# Supplementary material
Source: PubMed Central journal article supplement (PMC2667056)
Supplement: 0811409106_0811409106SI.pdf [file 0811409106_0811409106SI.pdf]

# Supporting Information

Reading et al. 10.1073/pnas.0811409106

## SI Materials and Methods

**Purification of QseE-His and Reconstitution into Liposomes.** A total of 500 mL of NR33 cells was grown in LB medium with the appropriate antibiotic at 37 °C to an optical density at 600 nm ( $OD_{600}$ ) of 0.3, and induced with 0.5 M IPTG. Cells were grown for 4 more hours at 37 °C, then harvested by centrifugation at  $10,000 \times g$  for 15 min. Inclusion bodies were isolated by resuspending the cells in 10 mL of BPERII Bacterial Protein Extraction Reagent (Pierce) and allowed to shake for 10 min. Cells were centrifuged at  $10,000 \times g$  for 15 min, and the pellet was resuspended in 10 mL of BPERII. Lysozymes to a final concentration of 200  $\mu\text{g}/\text{mL}$  and 50  $\mu\text{L}$  of His-tag protease inhibitor mixture (Sigma) were added, and cells were incubated at room temperature for 10 min. A total of 50 mL of diluted BPERII (1:20) was added to sample, and then cells were centrifuged for 15 min at  $10,000 \times g$ . Cells were washed again with 50 mL of diluted BPERII and spun. Cells were washed a total of 3 times, and each time the supernatant was saved for analysis. The final pellet contained purified inclusion bodies and QseE-His. Liposomes were reconstituted as described previously (1, 2).

**Phosphorylation of QseE-His in Liposomes.** A total of 20  $\mu\text{L}$  of the QseE-His-loaded liposomes was adjusted to 10 mM  $\text{MgCl}_2$ , 1 mM DTT, and various concentrations of signal molecules. Liposomes were frozen and thawed 3 times in liquid nitrogen, and kept light protected at room temperature for 1 h, allowing the loading of signals and the reformation of the liposomes. [ $\gamma\text{-}^{32}\text{P}$ ]dATP (0.5  $\mu\text{L}$ ; 110 TBq/mmol) was added to each reaction, and tubes were incubated for 5 min. After 5 min, 20  $\mu\text{L}$  of SDS-loading dye containing 20% SDS was added to each reaction, samples were subject to SDS/PAGE analysis without boiling, and phosphorylation was visualized by using a Storm PhosphorImager. Bands were quantified by using IMAGEQUANT version 5.0 software (Amersham Pharmacia).

**Identification of Proteins by Mass Spectrometry.** Kinase assays were completed as detailed above, but  $\gamma\text{-}^{32}\text{P}$ ATP was replaced with cold ATP. Samples were subjected to SDS/PAGE, and gels were stained with Coomassie stain. Bands corresponding to the size of bands from autoradiography detailed above were excised and submitted to the University of Texas Southwestern Protein Chemistry Core Facility. Briefly, in-gel bands were subject to trypsin digestion and reversed-phase, non-high-performance liquid chromatography/ion trap mass spectrometry. Resulting data sets were used to search against the EHEC EDL933 genome.

**RNA Extraction.** Cultures of 8624, NR01, NR02, and NR03 were grown aerobically in LB medium at 37 °C overnight and then were diluted 1:100 in low-glucose red DMEM and allowed to grow at 37 °C until they reached  $OD_{600}$  of 1.0. RNA was extracted from 3 replicates of each strain by using a RiboPure bacterial RNA isolation kit (Ambion) according to the manufacturer's instructions.

**Real-Time qRT-PCR.** Primers used in qRT-PCR analysis were designed by using Primer Express v 1.5 (Applied Biosystems) and are listed in Table S2. qRT-PCR analysis was conducted by using Applied Biosystems ABI 7500 sequence detection system using a 1-step reaction. Each primer set was checked for amplification efficiency by standard curves resulting from using varying concentrations of RNA template. To ensure template specificity, products were heated to 95 °C for 15 seconds, cooled to 60 °C,

and heated to 95 °C while fluorescence was monitored. To analyze gene expression in NR01, NR02, and NR03 compared with 86–24 *Escherichia coli*, relative quantification analysis was used. Parameters for cDNA generation and amplification were as follows: 1 cycle at 48 °C for 30 min, 1 cycle at 95 °C for 10 min, and 40 cycles at 95 °C for 15 seconds and 60 °C for 1 min. The RNA polymerase subunit Z, *rpoZ*, was used as an endogenous control. In each reaction of 20  $\mu\text{L}$ , 10  $\mu\text{L}$  of 2 $\times$  SYBR master mix, 0.1  $\mu\text{L}$  of Multiscribe reverse transcriptase (Applied Biosystems), and 0.1  $\mu\text{L}$  of RNase inhibitor (Applied Biosystems) were added.

**Detection, Quantification, and Statistical Analysis.** Applied Biosystems ABI Sequence Detection 1.3 software was used for initial collection of data. Values were normalized to *rpoZ* and analyzed by using the comparative critical threshold ( $C_T$ ) value as previously described (3). Expression is shown in graphs as *n*-fold change in expression level compared with wild-type levels at late exponential growth. Error bars represent the standard deviations of the  $\Delta\Delta C_T$  value. The Student *t* test was performed to assess statistical significance. A *P* value of less than 0.05 was considered significant.

**Membrane Preparation and Sucrose Density Gradient Centrifugation.** Membrane separation methodology was adapted from previously published methods for isolation of outer membranes from Gram-negative bacteria (4–6). A total of 500 mL of 86–24 and NR05 were grown in LB at 37 °C until they reached  $OD_{600}$  of 0.2. Cells were induced by the addition of 0.2% arabinose and harvested once they reached  $OD_{600}$  of 1.0 by centrifugation at  $10,000 \times g$  for 15 min. Cells were resuspended in 10 mL of 0.75 M sucrose in 5 mM Tris, pH 7.5. While stirring on ice, 40 mL of 10 mM EDTA-tetrasodium in 5 mM Tris, pH 7.5, was added, and cells were incubated on ice while stirring for 30 min. Lysozyme was added to a final concentration of 200  $\mu\text{g}/\text{mL}$ , and cells were incubated while stirring at room temperature for 30 min. Cells were osmotically lysed by the addition of 4.5 volumes or 240 mL of ice-cold  $\text{dH}_2\text{O}$ , and they were incubated on ice for 30 min while swirling. Debris was collected by centrifuging cells at  $10,000 \times g$  for 30 min. To collect total membranes, supernatants from the previous spin were divided into 8 tubes and ultracentrifuged for 2 h at  $200,000 \times g$  at 4 °C. Total membrane pellets were resuspended each in 1 mL of resuspension solution [25% sucrose in 5 mM Tris, 30 mM  $\text{MgCl}_2$ , 1 EDTA-free MiniComplete (Bio-Rad), 15  $\mu\text{L}$  of Benzonase (Invitrogen), and 13  $\mu\text{L}$  of His-tag protease inhibitor mixture (Sigma)]. Tubes were incubated, shaking at room temperature for 30 min to degrade DNA. Aliquots were taken, and total protein per membrane prep was determined by using the Bradford assay (Bio-Rad). Linear sucrose gradients were poured in 14  $\times$  99 mm Beckman ultracentrifuge tubes by layering 1.8 mL each of 55%, 50%, 45%, 40%, 35%, and 30% sucrose, and crude membrane preparations were layered on top of the 30% sucrose. Sucrose gradients were ultracentrifuged overnight for 17 h in an SW-40 Beckman rotor at  $256,000 \times g$  at 4 °C. Approximately 20 fractions of 500  $\mu\text{L}$  each were collected from each sucrose gradient by puncturing the bottom of the tube with an 18-gauge needle and letting fractions leave the tube by gravity flow. The refractive indexes of each fraction were determined by using a refractometer (Fisher Scientific), and the density of each fraction in grams per milliliter was calculated based on the refractive index (7). Fractions were diluted in SDS-loading dye, subjected to SDS/PAGE, and immunoblotted as described above to detect QseG.

1. Janausch IG, Garcia-Moreno I, Lehnen D, Zeuner Y, Uden G (2004) Phosphorylation and DNA binding of the regulator DcuR of the fumarate-responsive two-component system DcuSR of *Escherichia coli*. *Microbiology* 150:877–883.
2. Clarke MB, Hughes DT, Zhu C, Boedeker EC, Sperandio V (2006) The QseC sensor kinase: A bacterial adrenergic receptor. *Proc Natl Acad Sci USA* 103:10420–10425.
3. Walters M, Sircili MP, Sperandio V (2006) AI-3 synthesis is not dependent on luxS in *Escherichia coli*. *J Bacteriol* 188:5668–5681.
4. Huntley JF, Conley PG, Hagman KE, Norgard MV (2007) Characterization of *Francisella tularensis* outer membrane proteins. *J Bacteriol* 189:561–574.
5. Nikaido H (1994) Isolation of outer membranes. *Methods Enzymol* 235:225–234.
6. Osborn MJ, Gander JE, Parisi E, Carson J (1972) Mechanism of assembly of the outer membrane of *Salmonella typhimurium*. Isolation and characterization of cytoplasmic and outer membrane. *J Biol Chem* 247:3962–3972.
7. Knutton S, et al. (1991) Screening for enteropathogenic *Escherichia coli* in infants with diarrhea by the fluorescent-actin staining test. *Infect Immun* 59:365–371.

**Table S1. Strains and plasmids used in this study**

| Plasmid or strain | Relevant genotype                                                               | Reference or source |
|-------------------|---------------------------------------------------------------------------------|---------------------|
| <b>Strains</b>    |                                                                                 |                     |
| 86–24             | Stx2 and EHEC strain (serotype O157:H7)                                         | (1)                 |
| NR01              | 86–24 qseE nonpolar mutant                                                      | (2)                 |
| NR02              | 86–24 qseF nonpolar mutant                                                      | (2)                 |
| NR03              | 86–24 qseG nonpolar mutant                                                      | This study          |
| NR04              | NR01 complemented with plasmid pNR01                                            | (2)                 |
| NR05              | NR03 complemented with plasmid pNR03                                            | This study          |
| NR06              | NR02 complemented with plasmid pNR02                                            | (2)                 |
| KRL7              | 86–24 qseE polar mutant                                                         | (2)                 |
| NR26              | pK187 in NR02                                                                   | (2)                 |
| NR27              | pKC471 in NR02                                                                  | (2)                 |
| NR28              | pKH35–4 in BL21 DE3 cells                                                       | (3)                 |
| NR30              | pNR15 in NR02                                                                   | (2)                 |
| NR31              | pET16 in NR02                                                                   | (2)                 |
| NR32              | p635 in NR02                                                                    | (2)                 |
| NR33              | pNR30 in BL21 DE3 cells                                                         | This study          |
| NR34              | pcya in 8624                                                                    | This study          |
| NR36              | pcya in qseG <sup>−</sup>                                                       | This study          |
| NR37              | pcya-tir in 8624                                                                | This study          |
| NR39              | pcya-tir in qseG <sup>−</sup>                                                   | This study          |
| NR41              | pcya in qseG <sup>+</sup>                                                       | This study          |
| NR43              | pcya-tir in qseG <sup>+</sup>                                                   | This study          |
| NR44              | pDE2GFP in 8624                                                                 | This study          |
| NR45              | pDE2GFP in qseG <sup>−</sup>                                                    | This study          |
| NR46              | pDE2GFP in qseG <sup>+</sup>                                                    | This study          |
| CVD451            | 86–24 escN mutant                                                               | (4)                 |
| UMD872            | E2348/69 espA mutant                                                            | (5)                 |
| <b>Plasmids</b>   |                                                                                 |                     |
| pBadMycHis        | C-terminal Myc-His-tag cloning vector                                           | Invitrogen          |
| pRS551            | lacZ reporter gene fusion vector                                                | (6)                 |
| pNR01             | qseE in pBadMycHis                                                              | (2)                 |
| pVS254            | qseE-lacZ in pRS551                                                             | This study          |
| pNR02             | qseF in pBadMycHis                                                              | (2)                 |
| pNR03             | qseG in pBadMycHis                                                              | This study          |
| pKD3              | pANTS <sub>γ</sub> derivative containing FRT-flanked chloramphenicol resistance | (7)                 |
| pKM201            | λ red recombinase expression plasmid                                            | (8)                 |
| pCP20             | TS replication and thermal induction of FLP synthesis.                          | (7)                 |
| pRS551            | lacZ reporter gene fusion vector                                                | (6)                 |
| pNR10             | espFu in pRS551                                                                 | (2)                 |
| pNR30             | pET21 + qseE                                                                    | This study          |
| pKH35–4           | yfhA in pET21a(+)                                                               | (3)                 |
| pNR15             | qseF in pACYC177                                                                | (2)                 |
| pACYC177          | Cloning vector                                                                  | New England Biolabs |
| pVS262            | espFu in TOPO                                                                   | (2)                 |
| Topo              | Commercial blunt-end cloning vector                                             | Invitrogen          |
| pET16             | Expression vector                                                               | Novagen             |
| pET21             | Expression vector                                                               | Novagen             |
| pCya              | cyaA of <i>Bordetella pertussis</i> cloned into pACYC177                        | (9)                 |
| pCya-Tir          | tir-cyaA fusion cloned into pACYC177                                            | (9)                 |
| pDE2GFP           | gfp vector driven by the lac promoter                                           | Clontech            |

- Griffin PM, et al. (1988) Illnesses associated with *Escherichia coli* O157:H7 infections. A broad clinical spectrum. *Ann Intern Med* 109:705–712.
- Reading NC, et al. (2007) A novel two-component signaling system that activates transcription of an enterohemorrhagic *Escherichia coli* effector involved in remodeling of host actin. *J Bacteriol* 189:2468–2476.
- Yamamoto K, et al. (2005) Functional characterization in vitro of all two-component signal transduction systems from *Escherichia coli*. *J Biol Chem* 280:1448–1456.
- Jarvis KG, Kaper JB (1996) Secretion of extracellular proteins by enterohemorrhagic *Escherichia coli* via a putative type III secretion system. *Infect Immun* 64:4826–4829.
- Kenny B, Lai LC, Finlay BB, Donnenberg MS (1996) EspA, a protein secreted by enteropathogenic *Escherichia coli*, is required to induce signals in epithelial cells. *Mol Microbiol* 20:313–323.
- Simons RW, Houman F, Kleckner N (1987) Improved single and multicopy lac-based cloning vectors for protein and operon fusions. *Gene* 53:85–96.
- Datsenko KA, Wanner BL (2000) One-step inactivation of chromosomal genes in *Escherichia coli* K-12 using PCR products. *Proc Natl Acad Sci USA* 97:6640–6645.
- Murphy KC (1998) Use of bacteriophage lambda recombination functions to promote gene replacement in *Escherichia coli*. *J Bacteriol* 180:2063–2071.
- Crawford JA, Kaper JB (2002) The N-terminus of enteropathogenic *Escherichia coli* (EPEC) Tir mediates transport across bacterial and eukaryotic cell membranes. *Mol Microbiol* 46:855–868.
